# Supplementary material
Source: publisher figshare collection journal article supplement (https://karger.figshare.com/ndownloader/files/14488292)
Supplement: Supplementary file 1 [file 14488292]

## Sheet: X1
Suppl. Table 2. Genetic content of sex chromosomes and autosomes of Ctenonotus and their homology to the chromosomes of Anolis carolinensis.
CPOX1-WGA												CSAX1-WGA
chrom	ACA homology	reg.start	reg.end	reg.size	positions	pd.mean	pos.bp.mean	pos.bp.total	chrom.size			chrom	ACA homology	reg.start	reg.end	reg.size	positions	pd.mean	pos.bp.mean	pos.bp.total	chrom.size
6	ACA6	77504457	77511686	7229	10	547	230	2303	7229			6		77498384	77511170	12786	12	924	218	2619	12786
GL344182.1	ACA11	28470	65032	36562	9	4386	163	1471	65977			GL343282.1	ACAX	523965	607215	83250	65	1159	140	9105	1779868
GL343364.1	ACAX	3162	1077394	1074232	226	4601	172	38917	1083274					608390	1774261	1165871	294	3814	165	48383
GL344169.1	ACA11	6310	53222	46912	10	5038	157	1568	62994					4333	522624	518291	75	6870	133	9946
LGb	ACAX	14505	3259878	3245373	618	5091	169	104526	3271537			GL343313.1	ACA11	1189882	1200206	10324	6	1951	95	570	1458217
GL343338.1	ACAX	4424	1241532	1237108	234	5131	178	41540	1258094			GL343417.1	ACAX	256275	742421	486146	209	2168	168	35211	831895
GL343417.1	ACAX	19723	830365	810642	152	5191	177	26829	831895					746261	825820	79559	22	3638	144	3161
GL343202.1	ACA11	18017	4468698	4450681	787	5491	171	134477	4473256					8541	251061	242520	43	5651	120	5171
GL343758.1	ACA11	9178	203172	193994	33	5868	189	6230	206130			GL343364.1	ACAX	3127	1080904	1077777	372	2739	166	61736	1083274
GL343906.1	ACA11	3097	131805	128708	22	5915	204	4486	132628			GL344182.1	ACA11	14927	65535	50608	18	2815	153	2761	65977
GL344265.1	ACA11	14832	45786	30954	6	5929	218	1308	51599			GL343338.1	ACAX	8772	1256704	1247932	399	2966	169	67440	1258094
GL344032.1	ACA11	3755	72271	68516	12	6044	170	2037	86970			LGb	ACAX	9436	3260654	3251218	925	3354	165	152223	3271537
GL344006.1	ACA11	2588	89495	86907	15	6047	150	2243	119101			GL344175.1	ACA11	3309	59244	55935	17	3366	122	2071	61700
GL343376.1	ACA11	8759	975219	966460	151	6248	194	29233	1074340			GL344229.1	ACA11	24349	59403	35054	11	3393	102	1123	60657
GL344069.1	ACA11	37249	73452	36203	6	7068	144	865	82751			GL343758.1	ACA11	15689	201777	186088	45	4055	170	7650	206130
GL343522.1	ACA11	444114	502479	58365	9	7130	147	1324	516809			GL343761.1	ACA11	104	221475	221371	53	4117	137	7280	224237
		7319	418188	410869	27	15625	171	4624				GL343202.1	ACA11	1381	4467502	4466121	1026	4193	164	168401	4473256
GL343282.1	ACAX	23254	1775708	1752454	238	7233	161	38250	1779868			GL344032.1	ACA11	2052	85216	83164	19	4432	178	3380	86970
GL343780.1	ACA11	2384	237083	234699	32	7421	145	4653	240002			GL343906.1	ACA11	3446	113908	110462	25	4450	146	3652	132628
GL343423.1	ACAX	3384	807985	804601	107	7426	164	17497	834740			GL343813.1	ACA11	2684	164962	162278	36	4476	156	5612	171774
GL343813.1	ACA11	19604	156888	137284	19	7464	154	2925	171774			GL343376.1	ACA11	11077	1073092	1062015	221	4657	170	37460	1074340
GL343947.1	ACAX	221	109241	109020	15	7613	162	2434	117443			GL343423.1	ACAX	3121	831604	828483	173	4664	152	26281	834740
GL343528.1	ACA11	542	489927	489385	63	7744	147	9260	513901			GL343451.1	ACA11	3726	763681	759955	150	4960	140	20936	767560
GL343745.1	ACA11	4495	235991	231496	30	7790	186	5574	237135			GL344006.1	ACA11	2528	88330	85802	17	5206	147	2502	119101
GL343370.1	ACA11	6222	1105815	1099593	132	8215	177	23423	1106737			GL343595.1	ACA11	475	376244	375769	70	5312	132	9265	380579
GL343562.1	ACA11	3276	448518	445242	54	8223	175	9432	452073			GL343826.1	ACA11	675	166389	165714	30	5539	169	5071	166899
GL343808.1	ACA11	22891	167866	144975	18	8335	182	3276	172137			GL343528.1	ACA11	362	492524	492162	87	5568	153	13287	513901
GL343424.1	ACA11	1556	836791	835235	99	8340	181	17910	849089			GL344169.1	ACA11	4103	57936	53833	10	5832	134	1344	62994
GL343420.1	ACA11	5118	850072	844954	100	8342	191	19118	852146			GL343599.1	ACA11	3117	357018	353901	60	5845	151	9064	370929
GL343825.1	ACA11	132	162873	162741	20	8426	133	2654	174162			GL344120.1	ACA11	2031	69057	67026	12	5898	179	2145	71806
GL343310.1	ACA11	17087	1485548	1468461	169	8593	147	24788	1526251			GL343582.1	ACA11	1162	416162	415000	69	5940	160	11060	446356
GL343409.1	ACA11	8276	877632	869356	100	8632	148	14751	877829			GL344133.1	ACA11	2974	76941	73967	13	5999	153	1984	81599
GL343798.1	ACA11	11439	203197	191758	22	8980	144	3175	206366			GL343825.1	ACA11	10713	165678	154965	26	6057	136	3533	174162
GL343826.1	ACA11	434	165982	165548	19	9012	175	3332	166899			GL343808.1	ACA11	2308	159340	157032	26	6094	181	4694	172137
GL343582.1	ACA11	11775	430594	418819	46	9133	170	7823	446356			GL343420.1	ACA11	6030	850105	844075	135	6144	154	20748	852146
GL343387.1	ACA11	2652	1025591	1022939	110	9201	182	20039	1033662			GL343745.1	ACA11	4575	233602	229027	37	6217	141	5207	237135
GL343839.1	ACA11	15364	157161	141797	16	9341	105	1681	159515			GL343424.1	ACA11	7606	848020	840414	131	6314	150	19650	849089
GL343603.1	ACA11	689	372015	371326	40	9379	139	5546	372180			GL343780.1	ACA11	13189	234268	221079	35	6365	133	4664	240002
GL343686.1	ACA11	2968	269637	266669	28	9705	165	4629	270525			GL343694.1	ACA11	9103	256762	247659	39	6370	144	5606	272696
GL343735.1	ACA11	5675	246020	240345	25	9865	144	3593	248483			GL343310.1	ACA11	17050	1504326	1487276	226	6468	141	31974	1526251
GL343451.1	ACA11	24109	763866	739757	74	9963	168	12424	767560			GL343603.1	ACA11	9447	370545	361098	55	6542	142	7822	372180
GL343761.1	ACA11	3311	216264	212953	22	9973	160	3521	224237			GL343409.1	ACA11	857	873687	872830	128	6714	158	20189	877829
GL343597.1	ACA11	4174	385704	381530	38	10097	209	7936	399543			GL343387.1	ACA11	1579	1024993	1023414	149	6762	151	22567	1033662
GL343599.1	ACA11	3494	357376	353882	35	10244	160	5591	370929			GL343597.1	ACA11	10153	392066	381913	56	6789	152	8516	399543
GL343842.1	ACA11	4968	171989	167021	17	10252	176	2990	187838			GL343550.1	ACAX	84983	525081	440098	64	6849	135	8627	526944
GL343403.1	ACA11	18863	942163	923300	87	10572	162	14093	962590			GL343686.1	ACA11	3063	268308	265245	38	6980	184	6982	270525
GL343595.1	ACA11	3152	367633	364481	35	10601	115	4040	380579			GL343842.1	ACA11	16300	173798	157498	23	7009	144	3304	187838
GL344159.1	ACA11	7092	61390	54298	6	10661	166	995	64030			GL343370.1	ACA11	5767	1102631	1096864	148	7310	151	22285	1106737
GL343577.1	ACA11	6538	403709	397171	34	11879	152	5173	433749			GL343403.1	ACA11	9727	937684	927957	124	7392	151	18765	962590
GL343550.1	ACAX	35488	522212	486724	41	11996	168	6885	526944			GL343562.1	ACA11	3440	451201	447761	60	7450	137	8206	452073
GL343950.1	ACA11	20537	105840	85303	8	12001	162	1294	109966			GL343798.1	ACA11	11023	205428	194405	26	7623	147	3827	206366
GL343465.1	ACA11	4290	757338	753048	62	12233	111	6856	773181			GL344092.1	ACA11	21303	68490	47187	7	7698	143	1000	79072
GL343694.1	ACA11	1678	251794	250116	21	12359	140	2935	272696			GL343950.1	ACA11	738	105478	104740	13	8532	181	2351	109966
GL343875.1	ACA11	2794	146242	143448	12	12904	125	1501	148711			GL343875.1	ACA11	4875	146338	141463	17	8732	103	1757	148711
GL344293.1	ACA11	6043	67089	61046	6	12107	85	511	69853			GL343839.1	ACA11	12602	145451	132849	16	8736	113	1806	159515
GL344120.1	ACA11	4677	46892	42215	5	10381	138	692	71806			GL343522.1	ACA11	6875	512321	505446	54	9392	142	7679	516809
total									31898069			GL343465.1	ACA11	584	766001	765417	80	9573	114	9119	773181
unique									134350			GL343947.1	ACAX	2336	110095	107759	12	9641	143	1711	117443
												GL343577.1	ACA11	7975	429727	421752	43	9883	155	6676	433749
												GL343735.1	ACA11	5311	244471	239160	18	13926	134	2414	248483
												GL344159.1	ACA11	12159	53707	41548	5	10184	162	811	64030
												GL344293.1	ACA11	2702	38701	35999	5	8843	125	626	69853
Green shading: scaffolds which are present in both chromosomes.												total									33510521
												unique									1741245

## Sheet: X2
Suppl. Table 2. Genetic content of sex chromosomes and autosomes of Ctenonotus and their homology to the chromosomes of Anolis carolinensis.
CPOX2-WGA
chrom	ACA homology	reg.start	reg.end	reg.size	positions	pd.mean	pos.bp.mean	pos.bp.total	chrom.size
GL343546.1	ACA12	8931	436338	427407	75	5588	185	13884	443315
GL343507.1	ACA12	15566	497515	481949	55	8754	168	9253	543040
GL343856.1	ACA12	88157	137511	49354	6	9742	107	643	163722
GL343402.1	ACA12	14015	918488	904473	90	9995	166	14944	922494
GL343986.1	ACA12	20840	102505	81665	9	10039	150	1350	106386
GL343846.1	ACA12	18059	165565	147506	13	12135	145	1887	174342
GL343811.1	ACA12	16905	143580	126675	11	12547	110	1207	176381
GL343883.1	ACA12	24585	111405	86820	7	14301	145	1014	155660
GL343618.1	ACA12	11675	420608	408933	28	14983	157	4388	439716
GL343841.1	ACA12	26361	168518	142157	10	15669	113	1133	169083
GL343691.1	ACA12	21155	285026	263871	17	16352	132	2247	295632
GL343612.1	ACA12	28062	364987	336925	20	17590	136	2718	374040
GL343263.1	ACA12	1742	2050759	2049017	111	18464	162	17965	2052272
GL343769.1	ACA12	26276	214129	187853	11	18605	164	1803	215640
GL343749.1	ACA12	49712	190182	140470	8	19910	138	1101	224753
GL343327.1	ACA12	42009	1507659	1465650	73	20204	150	10972	1521598
GL343340.1	ACA12	8756	1223419	1214663	57	21542	146	8313	1244284
GL343649.1	ACA12	21241	307563	286322	14	21847	165	2311	349989
GL343588.1	ACA12	17188	413644	396456	18	23150	161	2904	426171
GL343518.1	ACA12	72679	551982	479303	21	23811	147	3085	597060
GL343592.1	ACA12	39540	409664	370124	16	24482	181	2896	441823
GL343500.1	ACA12	33962	595511	561549	23	25385	134	3076	630640
GL343621.1	ACA12	39724	335648	295924	12	26764	127	1519	355597
GL343385.1	ACA12	13339	987047	973708	30	33454	118	3533	1009857
GL343725.1	ACA12	35744	238148	202404	7	33601	114	796	255811
GL343580.1	ACA12	13929	366942	353013	11	35130	156	1716	525154
GL343650.1	ACA12	11615	345036	333421	10	36854	174	1736	386759
GL343591.1	ACA12	5271	417758	412487	12	37326	158	1899	435853
GL343977.1	ACA12	17235	76130	58895	5	14583	112	562	125577
	ACA12	17235	76130	58895	5	14583	112	562
GL343954.1	ACA12	37541	107373	69832	5	17314	115	576	114257
GL344276.1	ACA12	75614	101927	26313	4	8535	177	707	102650
GL344150.1	ACA12	7900	35093	27193	4	8937	96	382	65368
GL343936.1	ACA12	46082	89249	43167	4	14235	116	462	129587
GL343987.1	ACA12	29438	79516	50078	4	16529	123	492	127907
GL343954.1	ACA12	37541	107373	69832	5	17314	115	576	114257
GL344058.1	ACA12	20420	90219	69799	4	23081	139	556	104645
GL343803.1	ACA12	95717	168150	72433	4	23981	122	489	188206
total									15709526

## Sheet: Y
Suppl. Table 2. Genetic content of sex chromosomes and autosomes of Ctenonotus and their homology to the chromosomes of Anolis carolinensis.
CPOY-DOP											CPOY-WGA											CSAY-WGA
chrom	ACA homology	reg.start	reg.end	reg.size	positions	pd.mean	pos.bp.mean	pos.bp.total	chrom.size		chrom	ACA homology	reg.start	reg.end	reg.size	positions	pd.mean	pos.bp.mean	pos.bp.total	chrom.size		chrom	ACA homology	reg.start	reg.end	reg.size	positions	pd.mean	pos.bp.mean	pos.bp.total	chrom.size
GL343595.1	ACA11	3688	377718	374030	109	3322	140	15278	380579		GL343691.1	ACA12	157891	284666	126775	7	20955	150	1047	295632		GL343769.1	ACA12	168115	173185	5070	8	557	146	1169	215640
GL344293.1	ACA11	42699	62841	20142	6	3865	136	819	69853		GL343846.1	ACA12	7249	163670	156421	8	22218	112	896	174342				49167	166362	117195	9	14526	109	983
GL343846.1	ACA12	20459	171394	150935	34	4414	155	5263	174342		GL343595.1	ACA11	90066	315274	225208	7	37379	133	932	380579		GL343403.1	ACA11	686063	720197	34134	16	2121	145	2317	962590
GL343977.1	ACA12	18105	90681	72576	16	4634	192	3065	125577		GL343507.1	ACA12	25397	541986	516589	13	42879	157	2037	543040				69294	495827	426533	6	85111	163	979
GL343856.1	ACA12	7331	163540	156209	33	4727	149	4930	163722		GL343340.1	ACA12	46145	1215204	1169059	24	50689	134	3214	1244284		2		112686858	112820003	133145	58	2190	144	8326	133145
GL343936.1	ACA12	63484	93429	29945	7	4800	164	1147	129587		GL343522.1	ACA11	34088	460927	426839	9	53246	97	873	516809		GL344422.1	ACA12	4479	17581	13102	6	2440	151	904	50493
GL344306.1	ACA12	1564	27242	25678	6	4948	156	936	52792		GL343592.1	ACA12	30825	354822	323997	7	53836	140	983	441823		GL343420.1	ACA11	787689	844191	56502	17	3369	153	2603	852146
GL343883.1	ACA12	2236	98611	96375	19	5179	166	3153	155660		GL343385.1	ACA12	18008	975790	957782	18	56238	96	1732	1009857		GL343846.1	ACA12	16714	168557	151843	32	4759	135	4314	174342
GL344159.1	ACA11	11846	54871	43025	9	5271	95	858	64030		GL343618.1	ACA12	34609	384881	350272	7	58175	174	1221	439716		GL344033.1	ACA12	49222	88101	38879	9	4768	81	732	91815
GL344051.1	ACA12	5080	71410	66330	13	5349	164	2138	87026		GL343409.1	ACA11	13167	832628	819461	15	58392	131	1968	877829		GL343977.1	ACA12	6308	90642	84334	18	4774	177	3178	125577
GL344104.1	ACA12	5206	38376	33170	7	5399	111	775	79279		GL343327.1	ACA12	1034	1520843	1519809	26	60637	149	3872	1521598		GL343507.1	ACA12	12488	541508	529020	108	4784	159	17126	543040
GL343813.1	ACA11	16750	156732	139982	24	5921	158	3795	171774		GL343370.1	ACA11	46553	1093398	1046845	18	61420	150	2708	1106737		GL343761.1	ACA11	52088	220901	168813	30	5654	161	4836	224237
GL343507.1	ACA12	11205	541514	530309	88	5942	152	13337	543040		GL343263.1	ACA12	882255	2038240	1155985	17	72082	157	2665	2052272		GL343780.1	ACA11	22872	192654	169782	30	5712	138	4128	240002
GL343591.1	ACA12	487	425627	425140	69	6127	123	8472	435853		GL343465.1	ACA11	23816	724784	700968	10	77779	96	959	773181		GL343839.1	ACA11	7561	158591	151030	24	6438	124	2966	159515
GL343986.1	ACA12	35538	86367	50829	9	6209	128	1156	106386		GL343402.1	ACA12	223326	843717	620391	6	123898	150	900	922494		GL343595.1	ACA11	983	377756	376773	56	6710	138	7714	380579
GL343409.1	ACA11	804	877310	876506	137	6300	144	19689	877829													GL343588.1	ACA12	6345	426062	419717	62	6737	142	8781	426171
GL343202.1	ACA11	2204727	2353995	149268	24	6324	159	3826	4473256													GL343725.1	ACA12	15288	244005	228717	34	6795	132	4492	255811
		3734119	4453048	718929	52	13958	136	7092														GL343986.1	ACA12	21322	105375	84053	13	6867	127	1646	106386
GL343987.1	ACA12	8324	127212	118888	19	6475	123	2335	127907													GL343340.1	ACA12	2425	1215499	1213074	168	7112	151	25354	1244284
GL343758.1	ACA11	1376	183993	182617	28	6622	137	3829	206130													GL343883.1	ACA12	664	131663	130999	19	7120	150	2847	155660
GL343327.1	ACA12	2161	1519275	1517114	216	6901	155	33422	1521598													GL343950.1	ACA11	6992	96426	89434	13	7305	137	1778	109966
GL343385.1	ACA12	42333	998806	956473	136	6951	133	18034	1009857													GL343500.1	ACA12	970	628843	627873	85	7329	144	12272	630640
GL343340.1	ACA12	1931	1216874	1214943	170	7050	138	23462	1244284													GL343808.1	ACA11	24418	170457	146039	20	7515	163	3262	172137
GL343839.1	ACA11	10106	157098	146992	21	7217	126	2643	159515													GL343409.1	ACA11	857	877606	876749	111	7822	147	16365	877829
GL343691.1	ACA12	1235	289984	288749	39	7434	160	6239	295632													GL343370.1	ACA11	5767	1102401	1096634	138	7854	150	20671	1106737
GL343522.1	ACA11	1530	487865	486335	61	7964	140	8519	516809													GL343327.1	ACA12	10066	1511727	1501661	180	8234	154	27726	1521598
GL344251.1	ACA12	1496	42132	40636	6	7976	126	758	53891													GL343202.1	ACA11	3795124	4455858	660734	74	8888	161	11917	4473256
GL343465.1	ACA11	1397	761139	759742	90	8413	122	10954	773181															259903	2291898	2031995	91	22403	173	15713
GL343500.1	ACA12	5686	629199	623513	73	8520	138	10061	630640													GL343599.1	ACA11	4498	322920	318422	36	8949	144	5193	370929
GL343618.1	ACA12	1117	424945	423828	49	8664	163	7965	439716													GL343618.1	ACA12	1206	438255	437049	48	9154	142	6828	439716
GL343725.1	ACA12	937	236517	235580	26	9281	136	3548	255811													GL343691.1	ACA12	7036	286958	279922	31	9167	158	4904	295632
GL343588.1	ACA12	6363	420341	413978	44	9458	166	7303	426171													GL343385.1	ACA12	17567	1003766	986199	106	9268	123	13024	1009857
GL344027.1	ACA11	16273	103224	86951	10	9587	67	667	106912													GL343813.1	ACA11	38434	151729	113295	13	9281	148	1919	171774
GL343370.1	ACA11	5521	1099848	1094327	111	9792	155	17191	1106737													GL343592.1	ACA12	5678	414080	408402	44	9346	149	6535	441823
GL343808.1	ACA11	19221	170550	151329	16	9876	200	3194	172137													GL343591.1	ACA12	1916	421620	419704	44	9619	139	6099	435853
GL343686.1	ACA11	52680	197449	144769	15	10223	110	1650	270525													GL344051.1	ACA12	12415	82072	69657	8	9748	178	1423	87026
GL343387.1	ACA11	3131	268051	264920	26	10450	141	3664	1033662													GL343522.1	ACA11	7101	512959	505858	52	9769	146	7614	516809
GL343592.1	ACA12	110	427369	427259	40	10785	166	6625	441823													GL343758.1	ACA11	3427	173226	169799	18	9820	159	2864	206130
GL343780.1	ACA11	22755	227645	204890	19	11242	133	2531	240002													GL343856.1	ACA12	6153	153298	147145	14	11143	163	2282	163722
GL343950.1	ACA11	13528	93681	80153	8	11305	127	1019	109966													GL343465.1	ACA11	136	770763	770627	68	11369	131	8894	773181
GL343761.1	ACA11	66604	220001	153397	14	11632	156	2184	224237													GL343376.1	ACA11	8418	1001746	993328	84	11819	147	12328	1074340
GL343599.1	ACA11	4014	337852	333838	27	12667	166	4487	370929													GL343686.1	ACA11	44942	269436	224494	18	13053	144	2598	270525
GL343827.1	ACA12	29803	173950	144147	12	13003	93	1116	188980													GL343987.1	ACA12	13555	119376	105821	9	13100	113	1019	127907
GL343735.1	ACA11	10758	88879	78121	6	15445	149	895	248483													GL343612.1	ACA12	216179	322111	105932	9	13125	104	932	374040
GL343376.1	ACA11	5790	1048114	1042324	64	16366	176	11274	1074340													GL343650.1	ACA12	5140	112019	106879	9	13204	139	1248	386759
GL343420.1	ACA11	636423	844084	207661	13	17180	116	1502	852146													GL343263.1	ACA12	1116857	1956048	839191	59	14330	136	8033	2052272
GL343650.1	ACA11	17531	139825	122294	8	17278	169	1351	386759													GL343518.1	ACA12	416601	496903	80302	6	15836	187	1124	597060
GL343612.1	ACA12	26203	299595	273392	16	18112	107	1719	374040													GL343649.1	ACA12	112844	286490	173646	11	17245	109	1200	349989
GL343769.1	ACA12	40455	208273	167818	10	18502	130	1297	215640													GL343402.1	ACA12	410540	917356	506816	29	17968	128	3701	922494
GL343562.1	ACA11	89803	451297	361494	17	22474	112	1905	452073													GL343827.1	ACA12	37650	187727	150077	8	21273	146	1169	188980
GL343402.1	ACA12	20451	909025	888574	40	22629	151	6030	922494													GL343451.1	ACA11	4123	676838	672715	32	21543	153	4888	767560
GL343546.1	ACA12	25229	414908	389679	18	22765	148	2667	443315													GL343803.1	ACA12	7556	142765	135209	6	26920	101	607	188206
GL343403.1	ACA11	3572	895215	891643	36	25357	115	4156	962590													GL343387.1	ACA11	2658	832708	830050	30	28439	178	5332	1033662
GL343263.1	ACA12	17465	2038239	2020774	79	25737	168	13299	2052272													GL344251.1	ACA12	31073	53407	22334	7	3579	123	859	53891
total									28001789													GL343936.1	ACA12	38	96646	96608	8	13695	93	744	129587
																						GL344209.1	ACA12	4630	65550	60920	8	8617	75	600	73354
																						total									28736674
Green shading: scaffolds which are present in CSAY-WGA and CPOY-DOP. Red text: scaffolds which are present in CPOY-WGA and at least one of other probes.

## Sheet: 10
Suppl. Table 2. Genetic content of sex chromosomes and autosomes of Ctenonotus and their homology to the chromosomes of Anolis carolinensis.
CPO10-WGA											CPO10-DOP
chrom	ACA homology	reg.start	reg.end	reg.size	positions	pd.mean	pos.bp.mean	pos.bp.total	chrom.size		chrom	ACA homology	reg.start	reg.end	reg.size	positions	pd.mean	pos.bp.mean	pos.bp.total	chrom.size
GL343779.1	ACA14	114159	132084	17925	25	567	172	4311	195623		GL344021.1	ACA14	5483	90219	84736	16	5517	124	1978	98709
		133765	193971	60206	23	2573	157	3602			GL343864.1	ACA14	29599	145360	115761	21	5644	137	2884	146190
		4076	110627	106551	37	2822	134	4963			GL344009.1	ACA14	65089	105776	40687	8	5691	106	851	107227
GL343832.1	ACA14	109070	165262	56192	35	1443	204	7138	176311		GL343369.1	ACA14	339	1069922	1069583	180	5796	178	32091	1071154
		8685	96244	87559	16	5628	196	3134			GL344144.1	ACA14	4402	65890	61488	11	6001	134	1478	68567
GL343369.1	ACA14	186	1069934	1069748	533	1838	173	92185	1071154		GL343801.1	ACA14	17094	169585	152491	24	6473	150	3602	176099
GL343801.1	ACA14	7097	172926	165829	71	2190	177	12563	176099		GL343555.1	ACA14	7864	476585	468721	70	6660	131	9199	478700
GL344021.1	ACA14	8740	93341	84601	37	2199	147	5442	98709		GL343637.1	ACA14	13988	347004	333016	42	7928	189	7948	367058
GL344137.1	ACA14	790	59012	58222	23	2467	171	3941	67354		GL343898.1	ACA14	12539	113639	101100	13	8258	154	2001	139166
GL343961.1	ACA14	11891	102823	90932	34	2620	132	4471	106717		GL344077.1	ACA14	59040	101726	42686	6	8299	198	1191	105775
GL343890.1	ACA14	1196	129505	128309	47	2677	110	5172	138798		GL343961.1	ACA14	33310	102497	69187	9	8511	122	1099	106717
GL343555.1	ACA14	2594	473364	470770	146	3092	154	22487	478700		GL343640.1	ACA14	12813	328684	315871	37	8655	116	4308	338425
GL343864.1	ACA14	1925	135716	133791	42	3128	132	5561	146190		GL343652.1	ACA14	39906	299766	259860	30	8806	149	4477	316515
GL343802.1	ACA14	880	176985	176105	53	3203	180	9563	180133		GL344049.1	ACA14	34301	81036	46735	6	9179	140	839	87586
GL343862.1	ACA14	1896	155620	153724	45	3311	179	8056	158138		GL343699.1	ACA14	64853	259037	194184	19	10681	101	1921	272130
GL344049.1	ACA14	335	84383	84048	25	3362	135	3366	87586		GL343519.1	ACA14	5378	546068	540690	45	12135	150	6753	568258
GL344271.1	ACA14	19593	47921	28328	9	3391	134	1203	52346		GL343554.1	ACA14	11974	495713	483739	39	12602	125	4869	497447
GL343898.1	ACA14	7588	115293	107705	31	3461	125	3876	139166		GL343890.1	ACA14	3653	132542	128889	11	12748	128	1408	138798
GL343519.1	ACA14	2813	566158	563345	150	3620	159	23900	568258		GL343893.1	ACA14	15688	120940	105252	9	12972	164	1472	153579
GL344087.1	ACA14	358	73615	73257	20	3709	139	2789	79290		GL343805.1	ACA14	76	176805	176729	14	13440	143	2006	203613
GL344183.1	ACA14	3504	26823	23319	7	3715	147	1029	68178		GL343697.1	ACA14	63285	243190	179905	14	13678	150	2097	291329
GL344222.1	ACA14	4481	54644	50163	14	3718	131	1829	55756		GL343779.1	ACA14	21140	178262	157122	12	14108	162	1938	195623
GL343781.1	ACA14	3376	189286	185910	48	3842	112	5352	194410		GL343668.1	ACA14	64085	283706	219621	16	14487	145	2314	305731
GL343652.1	ACA14	674	309958	309284	75	4024	153	11507	316515		GL343832.1	ACA14	1425	149922	148497	11	14698	138	1515	176311
GL344174.1	ACA14	3	87551	87548	22	4031	131	2892	92697		GL343739.1	ACA14	5403	291400	285997	18	16693	123	2217	300301
GL343697.1	ACA14	4166	260624	256458	61	4131	141	8593	291329		GL343781.1	ACA14	29399	189286	159887	10	17619	132	1317	194410
GL343637.1	ACA14	1091	345060	343969	79	4264	144	11412	367058		GL343616.1	ACA14	93730	404299	310569	17	19266	136	2308	414442
GL343668.1	ACA14	10400	303435	293035	66	4346	159	10513	305731		GL344002.1	ACA14	3527	106422	102895	6	20431	123	738	110346
GL343554.1	ACA14	6131	466748	460617	102	4411	148	15070	497447		GL343862.1	ACA14	8586	155620	147034	8	20848	137	1095	158138
GL343893.1	ACA14	11012	147412	136400	30	4557	142	4254	153579		GL344087.1	ACA14	21730	65354	43624	4	14411	98	392	79290
GL343699.1	ACA14	4419	270259	265840	53	4979	131	6943	272130		GL343802.1	ACA14	31588	170018	138430	7	22908	140	979	180133
GL344221.1	ACA14	2056	63262	61206	13	5017	77	1001	65819		total									7847767
GL343928.1	ACA14	3670	128424	124754	24	5291	127	3054	133697
GL344077.1	ACA14	5336	100565	95229	18	5428	164	2960	105775
GL343739.1	ACA14	1163	295087	293924	52	5627	134	6967	300301
GL343616.1	ACA14	5290	412677	407387	66	6142	124	8179	414442
GL344012.1	ACA14	2859	91245	88386	15	6176	128	1919	92668
GL343640.1	ACA14	2991	337907	334916	54	6178	139	7501	338425
GL344002.1	ACA14	1724	100275	98551	16	6431	130	2087	110346
GL344045.1	ACA14	14473	126390	111917	18	6478	99	1784	127609
GL343805.1	ACA14	1965	200536	198571	31	6497	118	3660	203613
GL344144.1	ACA14	11290	65890	54600	9	6684	126	1132	68567
GL344248.1	ACA14	1866	58460	56594	9	7018	50	450	60922
GL344016.1	ACA14	1397	176351	174954	23	7780	165	3805	178346
GL343981.1	ACA14	9856	61802	51946	7	8514	123	864	100750
GL344076.1	ACA14	2831	81913	79082	9	9800	76	682	89871
GL343929.1	ACA14	17432	79291	61859	7	10141	145	1014	117718
GL343994.1	ACA14	6960	246045	239085	21	11836	113	2374	248741
GL344009.1	ACA14	8125	104195	96070	9	11884	110	994	107227
GL344255.1	ACA14	11168	34018	22850	3	11020	270	811	51995
total									9452234
Green shading: scaffolds which are present in both probes.

## Sheet: 12
Suppl. Table 2. Genetic content of sex chromosomes and autosomes of Ctenonotus and their homology to the chromosomes of Anolis carolinensis.
CPO12-WGA											CSA12-DOP											CSA12-WGA
chrom	ACA homology	reg.start	reg.end	reg.size	positions	pd.mean	pos.bp.mean	pos.bp.total	chrom.size		chrom	ACA homology	reg.start	reg.end	reg.size	positions	pd.mean	pos.bp.mean	pos.bp.total	chrom.size		chrom	ACA homology	reg.start	reg.end	reg.size	positions	pd.mean	pos.bp.mean	pos.bp.total	chrom.size
GL344244.1	ACA17	12938	34486	21548	8	2966	98	783	61544		GL344067.1	ACA17	5929	79535	73606	20	3739	128	2556	80796		GL344201.1	ACA17	18879	58741	39862	9	4820	145	1306	60076
GL343996.1	ACA17	20672	61221	40549	9	4952	104	935	113966		GL343848.1	ACA17	13245	155222	141977	31	4605	124	3833	157222		GL344083.1	ACA17	41461	94399	52938	11	5186	98	1079	95556
GL344201.1	ACA17	2549	53815	51266	10	5584	101	1010	60076		GL344204.1	ACA17	22564	44070	21506	5	5278	79	393	82294		GL343537.1	ACA17	37543	448631	411088	75	5420	133	10012	459035
GL343848.1	ACA17	35299	128469	93170	13	7631	123	1596	157222		GL344201.1	ACA17	4360	38688	34328	7	5600	104	726	60076		LGh	ACA17	43267	242568	199301	27	7519	141	3807	248369
GL344013.1	ACA17	37400	69740	32340	5	7989	77	385	110140		GL343537.1	ACA17	35173	423933	388760	69	5602	114	7839	459035		GL343848.1	ACA17	4363	155094	150731	20	7795	131	2618	157222
GL343537.1	ACA17	7118	408897	401779	45	8995	133	6003	459035		GL343881.1	ACA17	46276	119222	72946	13	5947	122	1581	168208		GL344013.1	ACA17	33912	92890	58978	8	8287	121	970	110140
GL344239.1	ACA17	14606	62776	48170	6	9522	94	561	68834		GL343996.1	ACA17	4455	101628	97173	17	5969	98	1664	113966		GL344123.1	ACA17	6417	60578	54161	7	8842	159	1112	72365
GL343629.1	ACA17	21221	373296	352075	32	11248	106	3390	386568		GL344135.1	ACA17	7188	79310	72122	11	7053	145	1590	81797		GL343996.1	ACA17	4473	109615	105142	12	9426	121	1451	113966
GL344123.1	ACA17	14753	72151	57398	6	11351	107	643	72365		GL343943.1	ACA16	49314	99671	50357	8	7072	107	855	117836		GL344067.1	ACA17	11742	61349	49607	6	9765	131	784	80796
GL343701.1	ACA17	11086	243852	232766	21	11522	111	2326	258118		GL343833.1	ACA17	3584	157869	154285	22	7216	125	2742	162211		GL343701.1	ACA17	13080	213239	200159	21	9859	142	2982	258118
GL343880.1	ACA17	14052	121528	107476	9	13284	134	1205	143572		GL343629.1	ACA17	11519	380442	368923	51	7260	116	5918	386568		GL343709.1	ACA17	4690	255005	250315	25	10266	158	3940	255715
GL343881.1	ACA17	845	108736	107891	9	13329	140	1261	168208		GL344013.1	ACA17	1120	108562	107442	15	7585	83	1246	110140		GL343925.1	ACA17	11301	112621	101320	9	12552	101	905	124852
GL343709.1	ACA17	15521	235637	220116	16	14545	122	1945	255715		GL343880.1	ACA17	517	127222	126705	17	7730	178	3029	143572		GL343629.1	ACA17	4151	385441	381290	30	13029	115	3461	386568
GL343615.1	ACA17	22443	398643	376200	26	14911	132	3421	404420		GL343817.1	ACA17	28567	131233	102666	14	7776	112	1574	185648		GL343880.1	ACA17	10035	116525	106490	9	13088	199	1790	143572
GL343833.1	ACA17	19039	154892	135853	9	16882	89	799	162211		GL343709.1	ACA17	5951	238150	232199	30	7873	130	3896	255715		GL343565.1	ACA17	2767	440812	438045	32	14012	115	3679	442653
GL343969.1	ACA17	5808	197477	191669	12	17341	77	919	201663		GL343925.1	ACA17	4132	109172	105040	13	8591	150	1944	124852		GL343817.1	ACA17	14654	131391	116737	9	14444	132	1186	185648
LGh	ACA17	33838	239341	205503	12	18527	142	1703	248369		LGh	ACA17	10715	230208	219493	26	8659	116	3023	248369		GL343334.1	ACA17	37323	1411827	1374504	92	14969	134	12353	1458869
GL343751.1	ACA16	150828	230571	79743	5	19808	103	513	260813		GL343647.1	ACA17	17367	364028	346661	40	8756	130	5186	369006		GL344230.1	ACA17	524	77897	77373	6	15360	96	574	80487
GL343535.1	ACA16	45363	308543	263180	13	21832	92	1200	487811		GL343980.1	ACA17	8013	99215	91202	11	9004	106	1164	111277		GL343615.1	ACA17	19342	299819	280477	19	15426	148	2809	404420
GL343925.1	ACA17	18196	109191	90995	5	22612	110	549	124852		GL343701.1	ACA17	8850	243852	235002	26	9249	145	3772	258118		GL343969.1	ACA17	1883	190707	188824	13	15595	130	1685	201663
GL343334.1	ACA17	40617	1433363	1392746	56	25209	112	6277	1458869		GL344178.1	ACA17	22826	90966	68140	8	9641	81	650	91189		GL343881.1	ACA17	14314	158907	144593	10	15888	160	1601	168208
GL343647.1	ACA17	2369	368234	365865	15	26033	93	1397	369006		GL344107.1	ACA17	6210	78247	72037	8	10164	112	892	85907		GL343833.1	ACA17	1511	161677	160166	10	17627	153	1527	162211
GL343565.1	ACA17	19624	416453	396829	16	26366	83	1334	442653		GL343334.1	ACA17	35146	1433400	1398254	136	10228	129	17487	1458869		GL343647.1	ACA17	6751	364028	357277	21	17744	114	2403	369006
GL343736.1	ACA16	17516	233122	215606	9	26851	88	796	273628		GL343760.1	ACA17	8733	200126	191393	19	10503	123	2333	207450		GL343760.1	ACA17	4458	148301	143843	9	17819	143	1288	207450
GL343763.1	ACA16	17918	165253	147335	6	29329	115	690	203182		GL343565.1	ACA17	5349	433241	427892	39	11114	142	5542	442653		GL343980.1	ACA 17	11555	35846	24291	5	5885	150	752	111277
GL343601.1	ACA16	16602	203156	186554	7	30936	134	941	390351		GL343763.1	ACA16	117298	164156	46858	5	11655	47	237	203182		GL344178.1	ACA 17	4631	69672	65041	5	16052	166	831	91189
GL343502.1	ACA16	190540	595667	405127	14	31076	82	1143	609587		GL343969.1	ACA17	2353	189855	187502	16	12367	125	1999	201663
GL343556.1	ACA16	12052	370736	358684	12	32526	75	897	436739		GL343615.1	ACA17	5568	400702	395134	31	13043	124	3831	404420
GL343609.1	ACA17	70872	371901	301029	10	33360	79	788	386960		GL343937.1	ACA16	16396	91514	75118	6	14884	117	700	118488
GL343625.1	ACA16	183902	356681	172779	6	34399	131	785	384974		GL343966.1	ACA16	19805	109257	89452	6	17805	71	426	110248
GL343541.1	ACA16	27649	445283	417634	12	37810	144	1723	480977		GL343736.1	ACA16	152189	242970	90781	6	17983	144	864	273628
GL343450.1	ACA16	325039	633893	308854	9	38421	165	1486	713523		GL343450.1	ACA16	197740	667282	469542	19	25953	125	2380	713523
GL343398.1	ACA16	23232	978818	955586	24	41438	104	2505	988007		GL343609.1	ACA17	3943	373088	369145	15	26247	113	1693	386960
GL343494.1	ACA16	15418	557745	542327	13	45106	81	1051	630767		GL343556.1	ACA16	126608	402585	275977	10	30522	128	1277	436739
GL343980.1	ACA17	50473	70521	20048	4	6581	76	304	111277		GL343601.1	ACA16	12752	382754	370002	12	33498	127	1525	390351
											LGg	ACA16	50179	390603	340424	11	33941	92	1010	424765
Green shading: scaffolds which are present in CSA12-DOP and CPO12-WGA. Red text: scaffolds which are present in CSA12-WGA and at least one of other probes.
Yellow shading: contaminant scaffolds from the chromosome 11. Note generally lower pdmean.

## Sheet: 13
Suppl. Table 2. Genetic content of sex chromosomes and autosomes of Ctenonotus and their homology to the chromosomes of Anolis carolinensis.
CPO13-WGA
chrom	ACA homology	reg.start	reg.end	reg.size	positions	pd.mean	pos.bp.mean	pos.bp.total	chrom.size
GL344241.1	ACA18	15617	47898	32281	11	3106	111	1219	57364
GL343942.1	ACA18	17910	65777	47867	12	4175	162	1942	128377
GL343852.1	ACA18	5965	147121	141156	26	5507	134	3473	160978
GL343878.1	ACA18	3081	144821	141740	24	6050	108	2594	145898
GL343757.1	ACA18	2188	236637	234449	35	6788	105	3660	247071
GL344270.1	ACA18	4802	46287	41485	7	6812	88	613	51720
GL344253.1	ACA18	5242	71411	66169	8	9382	62	497	72732
GL343717.1	ACA18	7694	296978	289284	31	9500	138	4277	339558
GL343756.1	ACA18	15496	248422	232926	25	9580	120	3007	266382
GL343661.1	ACA18	12178	300968	288790	27	10976	127	3418	304378
GL343966.1	ACA16	9777	71621	61844	6	12240	108	646	110248
GL344024.1	ACA18	14266	102051	87785	7	14481	128	897	102956
GL343658.1	ACA18	106322	305711	199389	11	19850	81	889	318012
GL343556.1	ACA16	31667	436690	405023	20	21211	101	2017	436739
LGg	ACA16	60335	377964	317629	13	26333	125	1628	424765
GL343531.1	ACA18	22026	256607	234581	9	29204	106	952	502109
GL343625.1	ACA16	7911	363737	355826	13	29508	133	1730	384974
GL343502.1	ACA16	33956	572164	538208	16	35726	145	2325	609587
GL343535.1	ACA16	2292	450345	448053	13	37168	157	2038	487811
GL343601.1	ACA16	9127	382781	373654	10	41365	137	1368	390351
GL343450.1	ACA16	15042	669043	654001	16	43425	164	2629	713523
GL343999.1	ACA16	16205	82390	66185	6	13125	93	559	102189
GL344210.1	ACA18	40134	49107	8973	5	2174	55	276	62600
GL343566.1	ACA18	369662	402994	33332	5	8200	106	530	458915
GL343956.1	ACA16	40386	105697	65311	5	16237	72	362	106260
Yellow shading: contaminant scaffolds from the chromosome 11. Note generally lower pdmean.

## Sheet: Legend
Suppl. Table 2. Genetic content of sex chromosomes and autosomes of Ctenonotus and their homology to the chromosomes of Anolis carolinensis.
chrom:	chromosome number or unmapped scaffold name in the genome of Anolis carolinensis (AnoCar2.0)
ACA homology:	location of the scaffold or macrochromosome fragment in the genome of Anolis carolinensis
reg.start:	coordinate of the beginning of mapped region, bp
reg.end:	coordinate of the end of mapped region, bp
reg.size:	length of mapped region, bp
positions:	number of merged read positions in mapped region
pd.mean:	mean pairwise distance between the aligned positions, bp
pos.bp.mean:	mean length of a position, bp
pos.bp.total:	total number of aligned bp
chrom.size:	size of the scaffold
